# Supplementary material
Source: MDPI journal article supplement (https://www.mdpi.com/2073-4395/11/8/1654)
Supplement: s1 [file s1]

**Supplementary Table S1.** Summary of aquaculture nutrition literature evaluating dietary cowpea.

| Aquaculture species            |                                                  | Cowpea                                             |                                | Experimental design                           |                                                                                                                                             |           |
|--------------------------------|--------------------------------------------------|----------------------------------------------------|--------------------------------|-----------------------------------------------|---------------------------------------------------------------------------------------------------------------------------------------------|-----------|
| Common name                    | Scientific name                                  | Scientific name - Type                             | Formulaion inclusion level (%) | Design                                        | Major findings                                                                                                                              | Reference |
| Black tiger prawn              | <i>Penaeus monodon</i>                           | <i>V. unguiculata</i> - Whole                      | 29.5                           | D and GT                                      | Dehulling increased the nutritional value of cowpea                                                                                         | [50]      |
|                                |                                                  | <i>V. unguiculata</i> - Dehulled                   | 24.68                          |                                               |                                                                                                                                             |           |
| Black tiger prawn              | <i>Penaeus monodon</i>                           | <i>V. unguiculata</i> - Whole                      | 20                             | GT                                            | Cowpea suitable at 20% contributing to low cost formulation                                                                                 | [51]      |
| Whiteleg shrimp                | <i>Litopenaeus vannamei</i>                      | <i>V. unguiculata</i> - Whole                      | 15                             | GT                                            | Cooking and extruding increased the nutritional value of cowpea                                                                             | [52]      |
|                                |                                                  | <i>V. unguiculata</i> - Dehulled                   | 15                             |                                               |                                                                                                                                             |           |
|                                |                                                  | <i>V. unguiculata</i> - Cooked                     | 15                             |                                               |                                                                                                                                             |           |
|                                |                                                  | <i>V. unguiculata</i> - Germinated                 | 15                             |                                               |                                                                                                                                             |           |
| Giant freshwater prawn         | <i>Macrobrachium rosenbergii</i>                 | <i>V. unguiculata</i> - Extruded                   | 15                             | FM replacement                                | Cowpea can replace 30-45% of FM without impairing performance                                                                               | [62]      |
|                                |                                                  | <i>V. unguiculata</i> - Whole                      | 15, 30, 45, and 60             |                                               |                                                                                                                                             |           |
|                                |                                                  | <i>V. unguiculata</i> - Whole                      | 30 (D)   20.5 (GT)             |                                               |                                                                                                                                             |           |
|                                |                                                  | <i>V. unguiculata</i> - Whole                      | 100                            |                                               |                                                                                                                                             |           |
| Indian carps - mrigal and rohu | <i>Cirrhinus mrigala</i> and <i>Labeo rohita</i> | <i>V. unguiculata</i> - Whole                      | 100                            | D and GT                                      | Cowpea was the least performing ingredient compared to soybean and mung bean                                                                | [48]      |
|                                |                                                  | <i>V. unguiculata</i> - Hydrothermally processed   | 100                            |                                               |                                                                                                                                             |           |
| Nile tilapia                   | <i>Oreochromis niloticus</i>                     | <i>V. catieng</i> - Whole                          | 10, 16, 18, 30, 32, 40, and 50 | FM replacement with different dietary protein | Cowpea can replace up to 20-33% FM without impairing performance                                                                            | [53]      |
| Nile tilapia                   | <i>Oreochromis niloticus</i>                     | <i>V. unguiculata</i> - Whole                      | 9, 18, 28, 37, 83   35         | FM replacement                                | Cowpea can be added up to 20% without adverse effects. Processing treatments improve the nutritional value of cowpea, however increase cost | [49]      |
|                                |                                                  | Heat treated (48C, dry heat)                       | 33                             |                                               |                                                                                                                                             |           |
|                                |                                                  | Heat treated (70C, dry heat)                       | 33                             |                                               |                                                                                                                                             |           |
|                                |                                                  | Heat treated (119C, wet heat)                      | 31                             |                                               |                                                                                                                                             |           |
|                                |                                                  | Dehulled treated (48C, dry heat)                   | 33                             |                                               |                                                                                                                                             |           |
|                                |                                                  | Dehulled treated (70C, dry heat)                   | 33                             |                                               |                                                                                                                                             |           |
|                                |                                                  | Dehulled treated (119C, wet heat)                  | 32                             |                                               |                                                                                                                                             |           |
| Nile tilapia                   | <i>Oreochromis niloticus</i>                     | <i>V. unguiculata</i> - Cowpea protein concentrate | 5, 10, 15, 20, and 25          | FM replacement                                | Highest growth with 20-30% FM replacement and best protein efficiency at 40%                                                                | [61]      |

D: digestibility, ID: in-vitro digestibility, GT: growth trial, FM: fishmeal.
